# Supplementary material for: Pattern of lymph node recurrence in upper tract urothelial carcinoma after lymph node dissection: Recommendations for optimizing the area of lymph node dissection
Source: Research Square preprint supplement (doi:10.21203/rs.3.rs-7366943/v1), 2025-11-06

Table S1. Recurrence and metastasis information during follow-up.

|  | **All patients** | **Other locationsa** | **Lower ureter** | ***P* value** |
| --- | --- | --- | --- | --- |
|  | 125 | 78 | 47 |  |
| **Local recurrence** | 32(25.6%) | 18(23.1%) | 14(29.8%) | 0.526# |
| **Time, month** | 5.0(2.0-12.8) | 3.5(1.0-12.3) | 9.0(2.8-13.5) | 0.220† |
| **One-year recurrence** | 24(19.2%) | 14(17.9%) | 10(21.3%) | 0.815# |
| **Intravesical or contralateral upper urinary recurrence** | 19(15.2%) | 9(11.5%) | 10(21.3%) | 0.198# |
| **Time, month** | 11.0(4.0-27.0) | 27.0(5.5-38.5) | 6.5(2.8-15.3) | 0.095† |
| **One-year recurrence** | 11(8.8%) | 3(3.8%) | 8(17.0%) | **0.028**‡ |
| **Metastasis** | 31(24.8%) | 14(17.9%) | 17(36.2%) | 0.032# |
| **Bone** | 14(11.2%) | 5(6.4%) | 9(19.1%) | **0.040**# |
| **Liver** | 11(8.8%) | 7(9.0%) | 4(8.5%) | 1.000‡ |
| **Lung** | 6(4.8%) | 2(2.6%) | 4(8.5%) | 0.283‡ |
| **Brain** | 1(0.8%) | 1(1.3%) | 0(0.0%) | 1.000§ |
| **Distant nodal** | 10(8.0%) | 5(6.4%) | 5(10.6%) | 0.614‡ |
| **Time, month** | 15.0(8.0-25.0) | 12.0(5.0-25.0) | 18.0(9.0-29.5) | 0.297† |
| **One-year metastasis** | 12(9.6%) | 7(9.0%) | 5(10.6%) | 1.000‡ |

aOther locations included: renal pelvis, upper and middle ureter;

#*p* value was determined by the Pearson’s Chi square test comparing the data;

†*p* value was determined by the Mann-Whitney U test;

‡*p* value was determined by the correction for continuity test;

§*p* value was determined by the Fisher’s exact test.

Table S2. The performance of lymph node dissection in the para-aortic lymph node region.

|  | **Left (*n* = 62)** | **Right (*n* = 63)** |
| --- | --- | --- |
| **Para-aortic lymph node region** | 17 | 15 |
| **LPA** | 17(100.0%) | 3(20.0%) |
| **AC** | 6(35.3%) | 8(53.3%) |
| **RPC** | 2(11.8%) | 10(66.7%) |

AC: aortocaval; LPA: left para-aortic; RPC: right paracaval.

Figure S1. Mapping of patients with recurrence (n = 32) and corresponding lymph node dissection (LND) performance, location of confirmed lymph node metastases (LNM) and lymph node recurrence. AC: aortocaval; LND: lymph node dissection; LNM: lymph node metastases; LPA: left para-aortic; RPC: right paracaval.


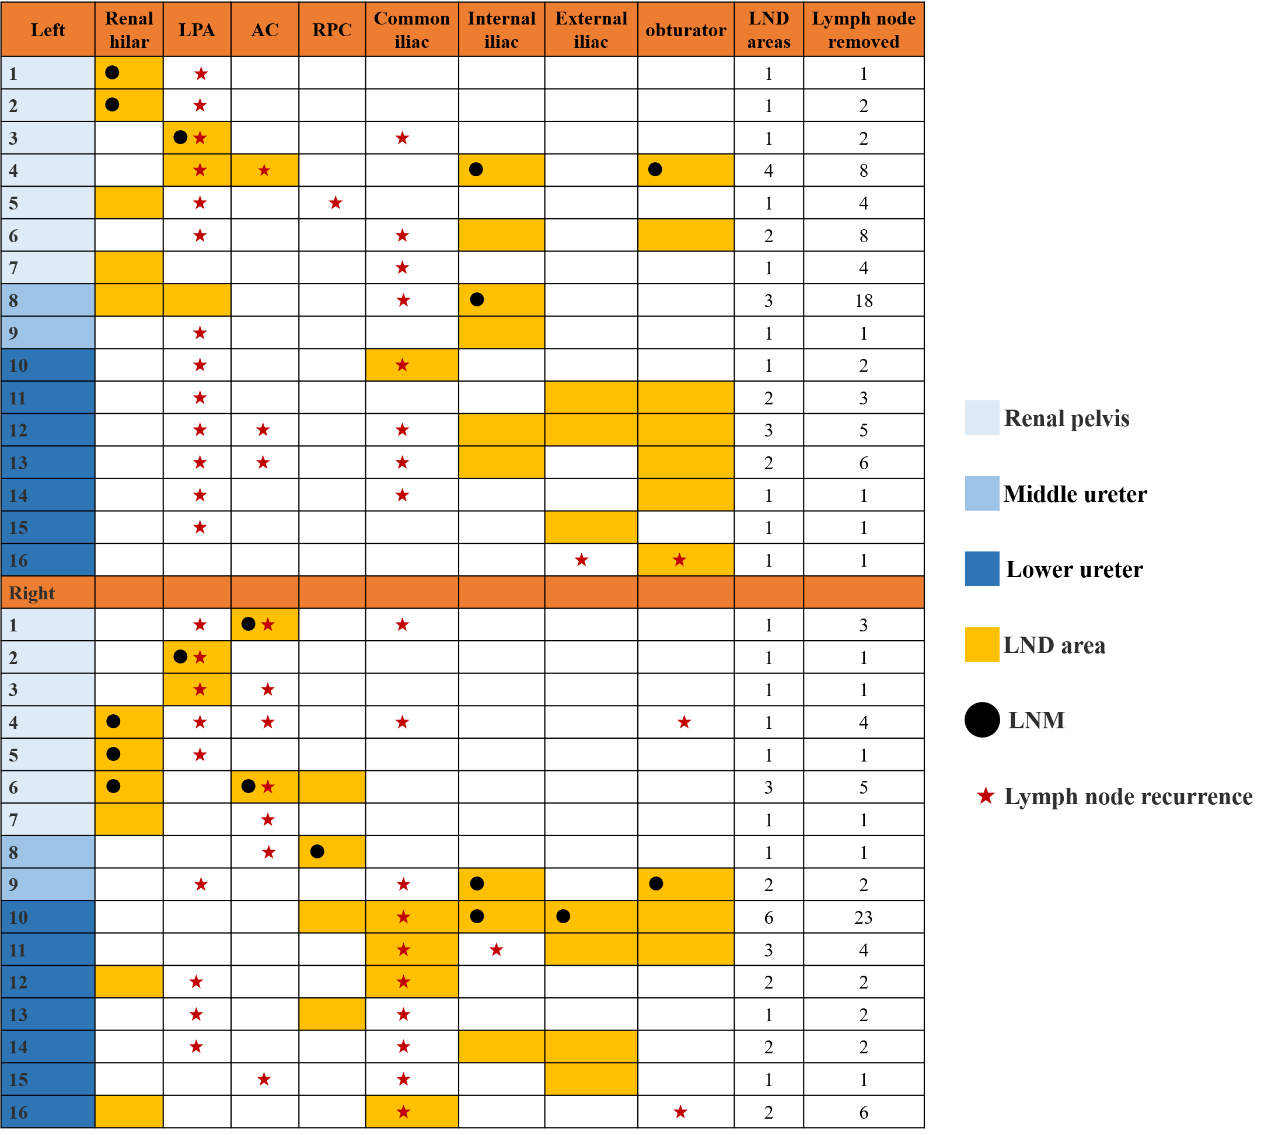

Supplement: Supplementary file 1 [file b251b72a2baca07eaf4ad35c.docx]
